# Supplementary material
Source: publisher figshare collection journal article supplement (https://gsapubs.figshare.com/ndownloader/files/23310059)
Supplement: Supplementary file 1 [file 23310059]

## Sheet: Fig. 1
Site	Lat	Long
S07-5-S09--6	19.3898	-155.292
S04-63	19.3941	-155.284
S05-288	19.3955	-155.286
S07-12	19.3931	-155.278
S04-46	19.3942	-155.276
S07-29	19.3953	-155.274
S07-39	19.3969	-155.272
S07-41	19.3982	-155.27
S07-42	19.3989	-155.268
S05-67	19.4173	-155.25
S01-46	19.4284	-155.255
S06-91	19.4085	-155.257
S9-59	19.4211	-155.243
S9-64	19.4097	-155.258
S9-69	19.4211	-155.291
S9-71	19.4251	-155.293
S07-43	19.4021	-155.293
S06-12	19.4327	-155.273
S06-13	19.4336	-155.274
S05-229	19.4235	-155.249
S07-45	19.4158	-155.287
S07-46	19.4205	-155.288
S07-47	19.4351	-155.274
S07-48	19.4106	-155.291
S07-49	19.4057	-155.292
S05-59	19.4321	-155.273
S05-55	19.4179	-155.252
S05-54	19.4094	-155.241
S05-52	19.4098	-155.245
S05-51	19.4107	-155.249
S05-49	19.4088	-155.252
S9-36	19.4143	-155.234
S07-54	19.4261	-155.283
S07-55	19.4239	-155.283
S07-56	19.4223	-155.286
S06-37	19.4056	-155.253
S06-36	19.4047	-155.261
S06-39	19.4066	-155.26
S07-57	19.4295	-155.278
S06-104	19.4395	-155.269
S02-4	19.4397	-155.275
S02-5	19.4431	-155.274
S02-7	19.4442	-155.273
S02-15	19.4463	-155.274
S02-21	19.4412	-155.249
S07-58	19.4312	-155.274
S07-59	19.4301	-155.27
S07-60	19.4354	-155.273
S07-61	19.43	-155.266
S07-62	19.4298	-155.261
S07-65	19.4228	-155.257
S05-58	19.4191	-155.253
S07-66	19.434	-155.274
S9-60	19.416	-155.257
S9-61	19.4134	-155.258
S07-68	19.41	-155.258
S07-69	19.406	-155.26
S07-70	19.4045	-155.263
S05-159	19.4001	-155.27
S08-1	19.4015	-155.269
S08-2	19.3914	-155.272
S06-49	19.3893	-155.272
S04-167	19.3923	-155.26
S04-166	19.3891	-155.258
S04-165	19.387	-155.256
S04-163	19.3869	-155.248
S04-162	19.3874	-155.248
S04-184	19.3953	-155.261
S04-185	19.3961	-155.257
S04-186	19.3984	-155.253
S04-93	19.404	-155.251
S04-94	19.4048	-155.247
S04-95	19.4021	-155.246
S05-197	19.4049	-155.242
S05-39	19.4082	-155.251
S06-51	19.4102	-155.25
S06-52	19.4028	-155.259
S0-25	19.3913	-155.245
S04-82	19.3796	-155.27
S04-83	19.3792	-155.266
S04-156	19.3929	-155.243
S04-157	19.3942	-155.24
S04-158	19.3958	-155.238
S04-160	19.3989	-155.233
S04-212	19.3939	-155.229
S04-213	19.395	-155.23
S04-214	19.3957	-155.23
S05-200	19.3928	-155.243
S05-201	19.3951	-155.239
S05-230	19.3827	-155.264
S06-58	19.4258	-155.296
S08-3	19.4255	-155.296
S08-4	19.3911	-155.294
S08-6	19.4014	-155.266
S08-14	19.4128	-155.3
S08-10	19.4115	-155.297
S08-11	19.4156	-155.294
J1	19.4131	-155.3
S08-12	19.4287	-155.258
S08-13	19.4133	-155.3
S08-19	19.4041	-155.31
S08-25	19.3961	-155.316
S08-60	19.4168	-155.298
S08-84	19.3977	-155.291
S08-128	19.3852	-155.301
S08-130	19.3913	-155.305
S08-131	19.4019	-155.303
S08-132	19.3958	-155.3
S08-135	19.4072	-155.311
S08-143	19.4155	-155.303
S08-146	19.4107	-155.302
S08-149	19.423	-155.291
S08-151	19.4248	-155.293
S08-155	19.422	-155.298
S08-156	19.4216	-155.297
S08-157	19.4048	-155.313
S08-158	19.3784	-155.321
S08-159	19.373	-155.318
S08-160	19.3673	-155.315
S08-161	19.3741	-155.309
S08-163	19.3711	-155.31
S08-164	19.3605	-155.312
S08-180	19.3597	-155.267
S08-210	19.4129	-155.29
S08-211	19.4139	-155.289
S08-212	19.4142	-155.289
S08-213	19.4115	-155.29
S08-209	19.4137	-155.292
S08-221	19.4093	-155.292
S08-223	19.4079	-155.292
S08-225	19.4052	-155.294
S08-235	19.4172	-155.293
F7-26	19.3939	-155.251
S09-4	19.408	-155.296
S09-13-14	19.3898	-155.29
S09-24	19.3851	-155.286
S09-37	19.3902	-155.275
S09-39	19.3785	-155.281
S09-40	19.3731	-155.283
S09-41	19.3705	-155.284
S09-42	19.3878	-155.293
S09-44	19.3857	-155.296
S09-53	19.3836	-155.259
S09-59	19.3891	-155.269
S09-57(crude)	19.3922	-155.269
S09-66	19.4239	-155.254
S09-71	19.4233	-155.253
S09-72	19.4213	-155.253
S09-77	19.4051	-155.295
S09-78	19.4031	-155.294
S09-80	19.4008	-155.295
S09-74	19.3969	-155.293
S09-82	19.4156	-155.295
S09-83	19.4168	-155.292
S09-85	19.408	-155.298
S09-87	19.4065	-155.299
S09-89	19.4035	-155.299
S09-90	19.401	-155.299
S09-91	19.3994	-155.298
S09-93	19.4238	-155.242
S09-98	19.424	-155.241
S06-53	19.4367	-155.236
S09-105	19.3974	-155.298
S09-110	19.4093	-155.301
S09-112	19.4091	-155.303
S09-113	19.4087	-155.307
S09-114	19.4064	-155.307
S09-115	19.4043	-155.308
S09-116	19.4031	-155.306
S09-117	19.4046	-155.302
S09-118	19.4063	-155.304
S09-119	19.425	-155.29
S09-122	19.4262	-155.288
S09-126	19.4256	-155.292
S09-128	19.4219	-155.294
S09-129	19.4228	-155.296
S09-130	19.4239	-155.298
S09-131	19.4212	-155.299
S09-133	19.4199	-155.297
S09-134	19.4179	-155.296
S09-141	19.4266	-155.286
S09-140	19.4277	-155.286
S09-151	19.4287	-155.286
S09-306	19.4293	-155.284
S09-323	19.4335	-155.285
S09-328	19.4375	-155.29
S09-330	19.4372	-155.292
S09-334	19.4367	-155.3
S09-335	19.4369	-155.301
S09-376	19.4284	-155.289
S09-401	19.4258	-155.293
S09-420	19.4336	-155.28
S09-1162	19.4099	-155.3
S09-1191	19.4069	-155.296
S09-1192	19.4176	-155.286
S09-1194	19.414	-155.289
S09-1196	19.4081	-155.293
K1790-09-53	19.419	-155.298
S09-1198	19.417	-155.3
S09-1210	19.4172	-155.302
S09-1211	19.4188	-155.304
S09-1212	19.4187	-155.307
S09-1213	19.4177	-155.309
S09-1214	19.4163	-155.311
S09-1215	19.4158	-155.308
S09-1216	19.4154	-155.305
K1790-9-51	19.4153	-155.302
K1790-9-50	19.4136	-155.302
K1790-9-44	19.4135	-155.3
K1790-9-48	19.4152	-155.3
K1790-9-14	19.4149	-155.297
K1790-9-46	19.4106	-155.302
S09-1217	19.4123	-155.304
S09-1218	19.4132	-155.307
S09-1219	19.4132	-155.31
S09-1220	19.41	-155.31
S09-1221	19.4101	-155.306
S09-1222	19.4091	-155.304
S09-1223	19.4117	-155.299
K1790-9-40	19.413	-155.296
S09-1224	19.4227	-155.3
S09-1225	19.4249	-155.302
S09-1226	19.4274	-155.305
S09-1227	19.4297	-155.306
S09-1228	19.4256	-155.309
S09-1230	19.4237	-155.308
S09-1231	19.4222	-155.305
S09-1232	19.4211	-155.304
S09-1233	19.4203	-155.31
S09-1234	19.4232	-155.314
S09-1235	19.419	-155.315
S09-1236	19.4162	-155.316
S09-1237	19.4119	-155.316
S09-1238	19.4092	-155.313
S09-1240	19.414	-155.313
S09-1247	19.413	-155.318
S09-1249	19.4102	-155.321
S09-1250	19.4081	-155.322
S08-27	19.4061	-155.324
S09-1251	19.4048	-155.324
S09-1252	19.4026	-155.325
S08-30	19.4004	-155.321
S09-1257	19.3984	-155.318
S09-1258	19.3963	-155.315
S09-1259	19.3981	-155.312
S09-1260	19.4017	-155.313
S09-1261	19.4019	-155.314
S09-1262	19.4051	-155.315
S09-1263	19.4078	-155.316
S09-1264	19.4101	-155.317
S10-444	19.415	-155.257
S10-549	19.4248	-155.259
S10-551	19.4263	-155.26
S10-577	19.3973	-155.301
S10-578	19.4021	-155.256
S10-579	19.4015	-155.252
S10-580	19.4004	-155.252
S10-581	19.4	-155.251
S10-582	19.4015	-155.246
S10-594	19.3854	-155.244
S10-595	19.3789	-155.24
S05-228	19.4298	-155.223
S10-596	19.3858	-155.251
S10-597	19.3717	-155.231
S10-601	19.3807	-155.22
S10-602	19.3843	-155.223
S10-603	19.3908	-155.227
S10-604	19.3952	-155.23
S10-605	19.4039	-155.234
S10-600	19.3706	-155.221
S10-608	19.4324	-155.259
S10-609	19.4206	-155.288
S10-623	19.3927	-155.308
S10-624	19.3937	-155.311
S10-625	19.3906	-155.315
S10-626	19.393	-155.319
S10-627	19.3961	-155.323
S10-628	19.3967	-155.324
S10-629	19.3982	-155.326
S10-631	19.3991	-155.328
S10-633	19.3949	-155.33
S10-634	19.3925	-155.327
S10-635	19.3894	-155.323
S10-636	19.3864	-155.319
S10-637	19.3863	-155.316
S10-638	19.3886	-155.313
S10-643	19.4159	-155.239
S10-644	19.4075	-155.307
S10-669	19.4125	-155.295
S10-671	19.4256	-155.286
S10-673	19.4044	-155.298
S10-674	19.4048	-155.3
S10-676	19.4028	-155.299
S10-677	19.401	-155.298
S10-682	19.4151	-155.291
S10-683	19.4119	-155.292
S10-684	19.4115	-155.294
S10-690	19.3826	-155.299
S10-691	19.3814	-155.297
F6-7	19.3638	-155.265
S10-695	19.3649	-155.266
S10-696	19.3613	-155.269
S12-1	19.4298	-155.259
S12-63	19.3541	-155.286
S12-86	19.3821	-155.299
S12-98	19.4029	-155.31
S12-99	19.4033	-155.301
S12-102	19.4071	-155.293
S12-104	19.3786	-155.275
S12-106	19.4079	-155.294
S12-114	19.3691	-155.267
S13-365	19.3847	-155.303
S13-367	19.3958	-155.264
S13-368	19.3887	-155.252
S13-436	19.3258	-155.281
S13-485	19.4426	-155.282
S16-183	19.3992	-155.259
WGS84

## Sheet: Fig. 2
Section no.	Field no.	Lat	Long	Thickness of indicated units in centimeters
				A	B	C	D	E	F	G	H	I	J1	J2
1	S07-46	19.4205	-155.288	0.5	38.5		12.5		9		12	18	12	16
2	S07-56	19.4223	-155.286	3	50		9		6		16	12		4
3	S07-55	19.4239	-155.283				1		6		24			12
4	S07-54	19.4261	-155.283	10	52	0.5			6		29			8
5	S07-57	19.4295	-155.278	0.5	34	1	24		6		29
6	S07-58	19.4312	-155.274	2	17	4	33		12	19	25
7	S07-59	19.4301	-155.27		38	9	47		11		69
8	S07-61	19.43	-155.266	1	33	4	18		8		68
9	S07-62	19.4298	-155.261	10	18	3	33		8	5	56
10	S07-65	19.4228	-155.257			68	135		8		36
11	S05-58	19.4191	-155.253		23	23	22		7	5	41
12	S9-60	19.416	-155.257		10	39	126				70
13	S9-61	19.4134	-155.258		14	6	91		13		20
14	S07-68	19.41	-155.258				86	4	3		67
15	S06-91	19.4085	-155.257		6	2	36	5	6	26	31	7	4
16	S07-69	19.406	-155.26	1			69	12	10	45		8	15
17	S07-70	19.4045	-155.263				>203	38	20	75	36	12	36
18	S07-42	19.3989	-155.268		3		387	33	23	195		7	55
19	S07-41	19.3982	-155.27	2			630	25	10	208		2	31
20	S07-39	19.3969	-155.272		4		538	17	6	148	36	11	78
21	S07-29	19.3953	-155.274				693	13	20	194	94	12	100
22	S04-46	19.3942	-155.276		1		654	11	14	270	25	9	96
23	S07-12	19.3931	-155.278				>276	5	4	249	55	5	110
24	S04-63	19.3941	-155.284				>194	2	34	236	200	5	92
25	S05-288	19.3955	-155.286				>170			99	149	22	69
26	S07-43	19.4021	-155.293		9	4	327		13	95	92	4	5
27	S07-49	19.4057	-155.292	1			130		10		184	6	1
28	S07-48	19.4106	-155.291	7	19		120		19		93	5	1
29	S07-45	19.4158	-155.287		10		67		13		17	18	16	6
30	S05-159	19.4001	-155.27				>210	30	8	239		8	103
WGS84
Units K and L were not recognized in these sections

## Sheet: Fig. 4
Site	Lat	Long	Thickness (cm)
8-17-98-3C	19.4335	-155.276	P
9-11-98-1	19.4269	-155.24	0-2
9-11-98-2	19.4235	-155.249	P
37916	19.4103	-155.237	3
S01-50	19.4284	-155.255	0.5
S02-5C	19.4431	-155.274	4
S02-15E	19.4463	-155.274	10
S02-21C	19.4412	-155.249	4
S05-67A	19.4173	-155.25	0-2
S06-53Z	19.4367	-155.236	1-2
S9-37	19.4486	-155.253	6
S9-38	19.4249	-155.221	5
F01-1-3.5	19.4688	-155.259	2
S01-21	19.3857	-155.251	0-1
S02-2	19.4599	-155.276	P
S02-7	19.4442	-155.273	1
S02-9	19.4443	-155.273	0-2
S02-12	19.4459	-155.274	P
July 10 2002	19.4489	-155.275	P
S03-1	19.433	-155.239	2
S04-208	19.3835	-155.222	P
S06-12	19.4327	-155.273	0.5
S06-104D	19.4395	-155.269	4
S07-46	19.4205	-155.288	2
S07-47	19.4351	-155.274	0.5
S07-48	19.4106	-155.291	0.7
S07-54	19.4261	-155.283	10
S07-56	19.4223	-155.286	3
S07-57	19.4295	-155.278	0.3
S07-58	19.4312	-155.274	1-2
S07-60	19.4354	-155.273	1
S07-61	19.43	-155.266	1
S07-62	19.4298	-155.261	5-12
S07-66	19.434	-155.274	5
S08-2	19.3914	-155.272	1
S06-49	19.3893	-155.272	0.5
GPS Point 8	19.4181	-155.295	2
GPS Point 21	19.4133	-155.29	P
S08-10	19.4115	-155.297	0.2
GPS Point 15	19.4156	-155.294	P
S08-12	19.4287	-155.258	0.5
S08-60	19.4168	-155.298	3.5
S08-151	19.4248	-155.293	P
S08-209	19.4137	-155.292	1
S08-211	19.4139	-155.289	0.1
S08-212	19.4142	-155.289	0-9
S08-213	19.4122	155.295	0.1
S08-223	19.4079	-155.292	0.1
S09-44	19.3857	-155.296	0.5
S09-66	19.4239	-155.254	6
S09-71	19.4233	-155.253	0.1
S09-77	19.4051	-155.295	2
S09-78	19.4031	-155.294	1.5
S09-85	19.408	-155.298	0.2
S09-93	19.4238	-155.242	0-3
S09-98	19.424	-155.241	0-2
S09-109	19.4091	-155.302	1
S09-112	19.4091	-155.303	0.1
S09-119	19.425	-155.29	1
S09-126	19.4256	-155.292	2
S09-140	19.4277	-155.286	2
S09-1192	19.4176	-155.286	0.3
S09-1193	19.4145	-155.289	0.1
S09-1196	19.4081	-155.293	0.1
K1790-9-44	19.4135	-155.3	0.5
S09-1299	19.4025	-155.316	0.3
S09-1270	19.4285	-155.283	0.1
S09-1273	19.4266	-155.285	0.5
S10-549	19.4248	-155.259	7
S10-551	19.4263	-155.26	2
S10-609	19.4206	-155.288	0.2
S10-643	19.4159	-155.239	2
S10-683	19.4119	-155.292	0.3
S12-1	19.4298	-155.259	0.4
S13-485	19.4426	-155.282	2
S17-1	19.4363	-155.273	3
WGS84
P = present

## Sheet: Fig. 7
Blockfall and ash					Blockfall only
Site	Lat	Long	Thickness, cm		Site	Lat	Long	Thickness, cm
S9-60	19.4155	-155.257	49		S01-60	19.4288	-155.254	20
S01-53	19.4284	-155.255	5-40		S07-65	19.4228	-155.257	>68
S02-7	19.4442	-155.273	7		9-17-98-4	19.4208	-155.255	75
S02-8	19.4486	-155.253	3		S09-66	19.4239	-155.254	23
S02-20	19.4316	-155.295	1		S09-71	19.4233	-155.253	30
S02-21	19.4412	-155.249	9		S10-444	19.415	-155.257	15
S03-2	19.4324	-155.239	7		S10-549	19.4248	-155.259	16
S04-1	19.4448	-155.283	4		S08-12	19.4287	-155.258	28
S04-101	19.4042	-155.243	<1		S05-58	19.4191	-155.253	23
S05-57	19.4193	-155.253	>8		S05-57	19.4193	-155.253	>8
S05-58	19.4191	-155.253	23		S01-53	19.4284	-155.255	5-40
S05-67	19.4173	-155.25	12		S9-60	19.4155	-155.257	49
S06-12	19.4327	-155.273	18
S06-53	19.4367	-155.236	3
S05-24	19.4319	-155.275	10
S03-1	19.433	-155.239	7
9-11-98-2	19.4235	-155.249	9
8-17-98-1	19.4336	-155.275	8
S06-91A	19.4085	-155.257	7
S06-104G	19.4395	-155.269	7
S01-60	19.4288	-155.254	20
S07-45	19.4158	-155.287	<1
S07-47	19.4351	-155.274	4
S07-57	19.4295	-155.278	<1
S07-54	19.4261	-155.283	<1
S07-58	19.4312	-155.274	23
S07-59	19.4301	-155.27	10
S07-60	19.4354	-155.273	8
S07-61	19.43	-155.266	4
S07-62	19.4298	-155.261	3
S07-65	19.4228	-155.257	>68
9-17-98-4	19.4208	-155.255	75
S07-66	19.434	-155.274	5
S9-61	19.4134	-155.258	6
S09-66	19.4239	-155.254	23
S09-71	19.4233	-155.253	30
S09-83	19.4168	-155.292	0.5
S09-85	19.408	-155.298	3
S09-87	19.4065	-155.299	0.5
S09-97A	19.4257	-155.239	2
S09-98	19.424	-155.241	3
S10-444	19.415	-155.257	15
S10-549	19.4248	-155.259	16
S10-551	19.4263	-155.26	4
GPS Point 8	19.4183	-155.295	2
GPS Point 15	19.4156	-155.294	P
S08-9	19.4128	-155.3	1
S08-11	19.4156	-155.294	1
S08-12	19.4287	-155.258	28
S08-13	19.4133	-155.3	1
S08-60	19.4168	-155.298	0.5
S08-131	19.4019	-155.303	1
S08-132	19.3958	-155.3	1
S08-149	19.423	-155.291	2
S08-151	19.4248	-155.293	2
S9-69	19.4212	-155.291	1
S10-608	19.4324	-155.259	8
S10-609	19.4206	-155.288	0.5
S10-643	19.4159	-155.239	4.5
S10-644	19.4075	-155.307	16
S10-673	19.4044	-155.298	6
S10-683	19.4119	-155.292	2
S9-36	19.4143	-155.234	1
S9-59	19.4211	-155.243	3
S17-1	19.4363	-155.273	11
WGS84

## Sheet: Fig. 14
Site	Lat	Long	Thickness, cm
S07-5-S09--6	19.3898	-155.292	421
S04-63	19.3941	-155.284	>196
S05-288	19.3955	-155.286	?
S07-12	19.3931	-155.278	>276
S04-46	19.3942	-155.276	653
S07-29	19.3953	-155.274	693
S07-39	19.3969	-155.272	542
S07-41	19.3982	-155.27	631
S07-42	19.3989	-155.268	387
S05-67	19.4173	-155.25	12
S01-46	19.4284	-155.255	0?
S06-91	19.4085	-155.257	36
S9-59	19.4211	-155.243	12
S9-64	19.4097	-155.258	76
S9-69	19.4211	-155.291	4.5
S9-71	19.4251	-155.293	?
S07-43	19.4021	-155.293	343
S06-12	19.4327	-155.273	46
S06-13	19.4336	-155.274	21
S07-45	19.4158	-155.287	66
S07-46	19.4205	-155.288	12.5
S07-47	19.4351	-155.274	38
S07-48	19.4106	-155.291	120
S07-49	19.4057	-155.292	130
S05-59	19.4321	-155.273	2
S05-55	19.4179	-155.252	25
S05-54	19.4094	-155.241	7
S05-52	19.4098	-155.245	1.5
S05-51	19.4107	-155.249	9
S05-49	19.4088	-155.252	11
S9-36	19.4143	-155.234	6
S07-55	19.4239	-155.283	0.5
S07-56	19.4223	-155.286	6
S06-37	19.4056	-155.253	14
S06-36	19.4047	-155.261	96
S06-39	19.4066	-155.26	>2
S07-57	19.4295	-155.278	25
S06-104	19.4395	-155.269	26
S02-4	19.4397	-155.275	10
S02-5	19.4431	-155.274	32
S02-7	19.4442	-155.273	16
S02-15	19.4463	-155.274	37
S02-21	19.4412	-155.249	40
S07-58	19.4312	-155.274	34
S07-59	19.4301	-155.27	54
S07-60	19.4354	-155.273	17.5
S07-61	19.43	-155.266	18.5
S07-62	19.4298	-155.261	33
S07-65	19.4228	-155.257	145
S05-58	19.4191	-155.253	22
S07-66	19.434	-155.274	18
S9-60	19.416	-155.257	127
S9-61	19.4134	-155.258	91
S07-68	19.41	-155.258	19
S07-69	19.406	-155.26	69
S07-70	19.4045	-155.263	203
S05-159	19.4001	-155.27	>210
S08-1	19.4015	-155.269	>353
S08-2	19.3914	-155.272	247
S06-49	19.3893	-155.272	141
S04-167	19.3923	-155.26	27
S04-166	19.3891	-155.258	8
S04-165	19.387	-155.256	21
S04-162	19.3874	-155.248	16
S04-184	19.3953	-155.261	>1
S04-185	19.3961	-155.257	22
S04-186	19.3984	-155.253	20
S04-93	19.404	-155.251	>1
S04-94	19.4048	-155.247	7
S04-95	19.4021	-155.246	>1
S05-197	19.4049	-155.242	4
S05-39	19.4082	-155.251	7
S06-51	19.4102	-155.25	6
S06-52	19.4028	-155.259	15
S0-25	19.3913	-155.245	1
S04-82	19.3796	-155.27	3
S04-83	19.3792	-155.266	4
S04-156	19.3929	-155.243	<1
S04-157	19.3942	-155.24	10
S04-158	19.3958	-155.238	4
S04-160	19.3989	-155.233	<1
S04-212	19.3939	-155.229	<1
S04-213	19.395	-155.23	<1
S04-214	19.3957	-155.23	<1
S05-200	19.3928	-155.243	<1
S05-201	19.3951	-155.239	<1
S05-230	19.3827	-155.264	1
S06-58	19.4258	-155.296	1
S08-3	19.4255	-155.296	60
S08-4	19.3911	-155.294	545
S08-14	19.4128	-155.3	23
S08-10	19.4115	-155.297	27
S08-11	19.4156	-155.294	34
J1	19.4131	-155.3	6.5
S08-12	19.4287	-155.258	85
S08-13	19.4133	-155.3	25
S08-19	19.4041	-155.31	44
S08-25	19.3961	-155.316	>9
S08-60	19.4168	-155.298	9
S08-84	19.3977	-155.291	166
S08-128	19.3852	-155.301	90
S08-130	19.3913	-155.305	71
S08-131	19.4019	-155.303	63
S08-132	19.3958	-155.3	153
S08-135	19.4072	-155.311	22
S08-143	19.4155	-155.303	10
S08-146	19.4107	-155.302	30
S08-149	19.423	-155.291	8
S08-155	19.422	-155.298	1.5
S08-156	19.4216	-155.297	19
S08-157	19.4048	-155.313	21
S08-158	19.3784	-155.321	7
S08-159	19.373	-155.318	34
S08-160	19.3673	-155.315	64
S08-161	19.3741	-155.309	15
S08-163	19.3711	-155.31	10
S08-164	19.3605	-155.312	12
S08-180	19.3597	-155.267	5
S08-210	19.4129	-155.29	101
S08-211	19.4139	-155.289	18
S08-212	19.4142	-155.289	106
S08-213	19.4115	-155.29	93
S08-209	19.4137	-155.292	52.5
S08-221	19.4093	-155.292	70
S08-223	19.4079	-155.292	49
S08-225	19.4052	-155.294	202
S08-235	19.4172	-155.293	26
F7-26	19.3939	-155.251	10
S09-4	19.408	-155.296	48
S09-13-14	19.3898	-155.29	360
S09-24	19.3851	-155.286	180
S09-37	19.3902	-155.275	320
S09-39	19.3785	-155.281	108
S09-40	19.3731	-155.283	39
S09-41	19.3705	-155.284	26
S09-42	19.3878	-155.293	345
S09-44	19.3857	-155.296	245
S09-53	19.3836	-155.259	9
S09-59	19.3891	-155.269	145
S09-57(crude)	19.3922	-155.269	164
S09-66	19.4239	-155.254	50
S09-71	19.4233	-155.253	35
S09-72	19.4213	-155.253	54
S09-77	19.4051	-155.295	100
S09-78	19.4031	-155.294	61
S09-80	19.4008	-155.295	313
S09-74	19.3969	-155.293	460
S09-82	19.4156	-155.295	15
S09-83	19.4168	-155.292	22
S09-85	19.408	-155.298	47
S09-87	19.4065	-155.299	45
S09-89	19.4035	-155.299	65
S09-90	19.401	-155.299	129
S09-91	19.3994	-155.298	239
S09-98	19.424	-155.241	2.5
S06-53	19.4367	-155.236	18
S09-105	19.3974	-155.298	254
S09-110	19.4093	-155.301	39
S09-112	19.4091	-155.303	22
S09-113	19.4087	-155.307	23
S09-114	19.4064	-155.307	22
S09-115	19.4043	-155.308	18
S09-116	19.4031	-155.306	80
S09-117	19.4046	-155.302	76
S09-118	19.4063	-155.304	102
S09-119	19.425	-155.29	2
S09-122	19.4262	-155.288	5
S09-126	19.4256	-155.292	4
S09-128	19.4219	-155.294	5
S09-129	19.4228	-155.296	4
S09-130	19.4239	-155.298	2
S09-131	19.4212	-155.299	1
S09-133	19.4199	-155.297	3
S09-134	19.4179	-155.296	3
S09-141	19.4266	-155.286	5
S09-140	19.4277	-155.286	1
S09-306	19.4293	-155.284	3
S09-323	19.4335	-155.285	3
S09-420	19.4336	-155.28	7
S09-1162	19.4099	-155.3	77
S09-1191	19.4069	-155.296	86
S09-1192	19.4176	-155.286	50
S09-1194	19.414	-155.289	87
S09-1196	19.4081	-155.293	130
K1790-09-53	19.419	-155.298	21
S09-1198	19.417	-155.3	26
S09-1210	19.4172	-155.302	5
S09-1211	19.4188	-155.304	4
S09-1212	19.4187	-155.307	4
S09-1213	19.4177	-155.309	3
S09-1215	19.4158	-155.308	2.5
S09-1216	19.4154	-155.305	3.5
K1790-9-51	19.4153	-155.302	7.5
K1790-9-50	19.4136	-155.302	22
K1790-9-44	19.4135	-155.3	21
K1790-9-48	19.4152	-155.3	11.5
K1790-9-14	19.4149	-155.297	14.5
K1790-9-46	19.4106	-155.302	23
S09-1217	19.4123	-155.304	11
S09-1218	19.4132	-155.307	11
S09-1219	19.4132	-155.31	17.5
S09-1220	19.41	-155.31	19
S09-1221	19.4101	-155.306	18
S09-1222	19.4091	-155.304	26
S09-1223	19.4117	-155.299	41
K1790-9-40	19.413	-155.296	31
S09-1230	19.4237	-155.308	1
S09-1232	19.4211	-155.304	1
S09-1233	19.4203	-155.31	7
S09-1235	19.419	-155.315	1
S09-1236	19.4162	-155.316	1
S09-1237	19.4119	-155.316	7
S09-1238	19.4092	-155.313	22
S09-1240	19.414	-155.313	4.5
S09-1247	19.413	-155.318	5
S09-1249	19.4102	-155.321	9
S09-1250	19.4081	-155.322	12
S08-27	19.4061	-155.324	5
S09-1251	19.4048	-155.324	12.5
S09-1252	19.4026	-155.325	8
S08-30	19.4004	-155.321	22
S09-1257	19.3984	-155.318	39
S09-1258	19.3963	-155.315	54
S09-1259	19.3981	-155.312	26
S09-1260	19.4017	-155.313	41
S09-1261	19.4019	-155.314	35.5
S09-1262	19.4051	-155.315	25
S09-1263	19.4078	-155.316	50
S09-1264	19.4101	-155.317	26.5
S10-444	19.415	-155.257	139
S10-549	19.4248	-155.259	80
S10-551	19.4263	-155.26	164
S10-577	19.3973	-155.301	74
S10-578	19.4021	-155.256	5
S10-579	19.4015	-155.252	15.5
S10-580	19.4004	-155.252	18
S10-581	19.4	-155.251	16
S10-582	19.4015	-155.246	6
S05-228	19.4298	-155.223	5
S10-596	19.3858	-155.251	2
S10-597	19.3717	-155.231	0
S10-601	19.3807	-155.22	2
S10-602	19.3843	-155.223	8
S10-603	19.3908	-155.227	3
S10-604	19.3952	-155.23	1
S10-605	19.4039	-155.234	0.5
S10-608	19.4324	-155.259	58
S10-609	19.4206	-155.288	14.5
S10-623	19.3927	-155.308	39
S10-624	19.3937	-155.311	13
S10-625	19.3906	-155.315	0.5
S10-626	19.393	-155.319	17
S10-627	19.3961	-155.323	32
S10-628	19.3967	-155.324	43
S10-629	19.3982	-155.326	42
S10-631	19.3991	-155.328	21
S10-633	19.3949	-155.33	39
S10-634	19.3925	-155.327	57
S10-635	19.3894	-155.323	20
S10-636	19.3864	-155.319	57
S10-637	19.3863	-155.316	58
S10-638	19.3886	-155.313	80
S10-644	19.4075	-155.307	79
S10-669	19.4125	-155.295	30.5
S10-671	19.4256	-155.286	0.5
S10-673	19.4044	-155.298	116
S10-674	19.4048	-155.3	59
S10-676	19.4028	-155.299	41
S10-677	19.401	-155.298	97
S10-682	19.4151	-155.291	26
S10-683	19.4119	-155.292	84
S10-684	19.4115	-155.294	36
S10-690	19.3826	-155.299	17
S10-691	19.3814	-155.297	56
F6-7	19.3638	-155.265	0.2
S10-696	19.3613	-155.269	1
S12-1	19.4298	-155.259	107
S12-63	19.3541	-155.286	20
S12-86	19.3821	-155.299	13
S12-98	19.4029	-155.31	24.5
S12-99	19.4033	-155.301	65
S12-102	19.4071	-155.293	>109
S12-104	19.3786	-155.275	22
S12-106	19.4079	-155.294	97
S12-114	19.3691	-155.267	16
S13-365	19.3847	-155.303	37
S13-367	19.3958	-155.264	53
S13-368	19.3887	-155.252	3
S13-436	19.3258	-155.281	12
S13-485	19.4426	-155.282	4
S16-183	19.3992	-155.259	34
WGS84

## Sheet: Fig. 15A
Site	Lat	Long	Thickness, cm
10-22-98-2	19.3999	-155.232	6
10-22-98-1	19.3676	-155.219	14
10-27-98-2	19.3935	-155.251	20
10-27-98-1	19.392	-155.249	8
F7-15	19.3478	-155.253	8
F7-16	19.345	-155.253	10
F7-17	19.3422	-155.254	10
F8-1	19.3509	-155.254	7
F8-2	19.3507	-155.256	7
F7-23	19.3501	-155.256	7
F7-27	19.3609	-155.255	7
F7-28	19.363	-155.258	4
F7-29	19.363	-155.26	8
F6-1(near)	19.3651	-155.26	6
F7-6	19.3294	-155.259	2
F8-9	19.3641	-155.25	8
F8-10	19.3667	-155.25	10
F8-13	19.3606	-155.253	6
S7-103	19.349	-155.209	2
F9-10	19.3572	-155.244	8
F7-9	19.3322	-155.222	2
F7-21	19.3726	-155.234	12
S9-42	19.3689	-155.249	11
S9-40	19.3678	-155.256	10
S9-74	19.4051	-155.253	6
S0-9	19.3439	-155.262	2
F7-3	19.3446	-155.264	2
S0-7	19.3244	-155.253	3
F0-8	19.3402	-155.266	2
F0-11	19.3378	-155.224	1
F0-12	19.332	-155.222	2
F0-16	19.3217	-155.23	7
S0-9	19.3967	-155.238	3
S0-10	19.3954	-155.239	2.5
S0-11	19.3933	-155.242	4
S0-12	19.392	-155.245	8
S0-25	19.3913	-155.245	8
S0-27	19.383	-155.244	8
S0-28	19.3796	-155.22	5
S0-20	19.3861	-155.246	8
S0-29	19.3738	-155.235	6
S0-30	19.3739	-155.235	9
S0-31	19.3774	-155.233	12
S0-32	19.3752	-155.235	11
S0-33	19.3766	-155.218	9
S0-34	19.375	-155.217	5
S0-35	19.3663	-155.222	5
S0-51	19.3391	-155.262	8
S0-59	19.3332	-155.239	7
S01-9	19.3691	-155.233	4
S01-10	19.3661	-155.233	6
S01-11	19.3636	-155.233	6
S01-15	19.351	-155.252	10, 19
S01-16	19.4014	-155.267	36
S01-17	19.4012	-155.267	33
S01-18	19.3989	-155.268	31
S01-19	19.3983	-155.269	25
S01-20	19.3984	-155.27	24
S01-21	19.3857	-155.251	12
S01-22	19.387	-155.256	11
S01-23	19.3955	-155.273	12
S01-24	19.3954	-155.274	13
S01-25	19.3943	-155.276	10
S01-26	19.3931	-155.278	6
S01-27	19.3913	-155.272	9
S01-28	19.3923	-155.272	9
S01-29	19.3937	-155.272	13
S01-30	19.3903	-155.272	8
S01-31	19.3892	-155.271	9
S01-32	19.3889	-155.272	7
S01-33	19.3879	-155.273	7
S01-34	19.3893	-155.269	8
S01-35	19.3912	-155.269	13
S01-36	19.3918	-155.268	14
S01-37	19.3937	-155.269	15
S01-38	19.391	-155.268	13
F7-24	19.3982	-155.253	?
F8-18	19.3619	-155.265	?
S01-40	19.3631	-155.26	6
S01-41	19.3561	-155.249	3-4
S01-42	19.354	-155.241	5
F01-56	19.363	-155.26	5
S01-45	19.3633	-155.259	7.5
F01-62	19.3237	-155.225	2
F01-57	19.3633	-155.259	6
S01-62	19.3975	-155.271	20
S01-63	19.3705	-155.265	8
S02-1	19.3412	-155.21	6
KMU109	19.3735	-155.26	12
S04-4	19.3549	-155.261	5
S04-5	19.3532	-155.263	5?
S04-7	19.3988	-155.265	23
S04-8	19.398	-155.264	26
S04-9	19.3981	-155.263	12-16
S04-11	19.4019	-155.263	17
S04-12	19.4021	-155.263	19
S04-13	19.4023	-155.264	37
S04-14	19.3725	-155.234	7
S04-15	19.3783	-155.239	7
S04-16	19.3644	-155.249	4-7
S04-17	19.3518	-155.255	3
S04-18	19.3508	-155.254	3-4
S04-19	19.3516	-155.257	8
S04-20	19.3498	-155.261	7
S04-21	19.3464	-155.264	7
S04-22	19.3446	-155.268	7
S04-23	19.3433	-155.271	3
S04-24	19.3415	-155.277	3
S04-26	19.3996	-155.272	25
S04-27	19.4004	-155.27	32
S04-28	19.3991	-155.271	26
S04-29	19.3788	-155.277	3.75
S04-32	19.389	-155.272	11
S04-33	19.3933	-155.273	10
S04-34	19.3939	-155.273	10
S04-35	19.3937	-155.272	16
S04-37	19.3903	-155.272	9
S04-38	19.3877	-155.268	16
S04-40	19.3951	-155.267	20
S04-41	19.3919	-155.268	14
S04-42	19.3921	-155.268	16
S04-43	19.3881	-155.267	15
S04-44	19.3807	-155.271	6
S04-45	19.3931	-155.278	5
S04-46	19.3942	-155.276	12
S04-47	19.3871	-155.279	5
S04-49	19.3896	-155.275	5
S04-50	19.3873	-155.28	4
S04-51	19.3763	-155.274	4
S04-52	19.374	-155.273	9
S04-53	19.404	-155.265	52
S04-54	19.405	-155.263	36
S04-55	19.4052	-155.263	25
S04-56	19.4055	-155.262	4
S04-58	19.3978	-155.27	22
S04-59	19.3974	-155.271	22
S04-61	19.3969	-155.273	16
S04-62	19.3935	-155.283	2
S04-63	19.3941	-155.284	1-1.5
S04-66	19.3845	-155.282	1
S04-67	19.3844	-155.283	1
S04-70	19.3649	-155.262	3.5
S04-71	19.3928	-155.274	10
S04-36	19.3928	-155.272	12
S04-72	19.3922	-155.249	15
S04-73	19.3755	-155.24	0-16
S04-74	19.3736	-155.241	0-14
S04-75	19.3704	-155.243	5
S04-76	19.3665	-155.245	7
S04-79	19.3555	-155.255	12
S04-80	19.3559	-155.26	8
S04-81	19.3604	-155.261	8
S04-82	19.3796	-155.27	11
S04-83	19.3792	-155.266	12
S04-84	19.3715	-155.269	8
S04-85	19.3742	-155.217	4
S04-86	19.3663	-155.222	3
S04-87	19.3711	-155.226	3
S04-88	19.3571	-155.224	4
S04-89	19.3492	-155.219	4
S04-90	19.3456	-155.213	3-4
S04-77	19.3601	-155.254	5
S04-93	19.404	-155.251	6
S04-94	19.4048	-155.247	4
S04-95	19.4021	-155.246	4
S04-96	19.4034	-155.243	1-2
S04-101	19.4042	-155.243	1-2
S04-102	19.3651	-155.215	2-3
S04-103	19.365	-155.216	6
S04-109	19.3665	-155.214	3
S04-110	19.3648	-155.215	4
S04-111	19.3576	-155.215	4
S04-117	19.3746	-155.216	2
S04-118	19.349	-155.209	1
S04-119	19.3406	-155.209	1-2
F02-23	19.3253	-155.183	4
S04-120	19.3414	-155.21	1-3
S04-121	19.3278	-155.185	1-2
S04-122	19.3295	-155.186	2
S04-123	19.333	-155.186	1-2
S04-124	19.3367	-155.186	3
S04-125	19.3401	-155.186	1
S04-126	19.344	-155.186	2
S04-127	19.3405	-155.184	1
S04-128	19.3372	-155.18	1
S04-129	19.3333	-155.179	1
S04-130	19.3297	-155.177	1-2
S04-131	19.3261	-155.177	2
S04-132	19.321	-155.178	<1
S04-133	19.3238	-155.18	2
S04-134	19.3258	-155.183	3
S04-143	19.3754	-155.275	1
S04-145	19.3722	-155.274	7
S04-146	19.3689	-155.274	6
S04-147	19.3694	-155.278	1
S04-148	19.3664	-155.275	<1
S04-151	19.3345	-155.277	5
S04-152	19.3322	-155.279	2
S04-150	19.3364	-155.274	1-2
S04-153	19.3248	-155.28	0-2
S04-154	19.3203	-155.287	1
S04-155	19.3248	-155.281	0.5
S0-25	19.3913	-155.245	8
S04-156	19.3929	-155.243	8
S04-157	19.3942	-155.24	5
S04-158	19.3958	-155.238	3
S04-159	19.3974	-155.235	1-2
S04-160	19.3989	-155.233	1-2
S04-161	19.3994	-155.232	1
S0-9	19.3967	-155.238	3
S0-10	19.3953	-155.24	2-3
S0-11	19.3943	-155.241	4
S0-12	19.3913	-155.246	8
S04-162	19.3874	-155.248	9
S04-163	19.3869	-155.248	11
S04-164	19.3857	-155.251	10
S04-165	19.387	-155.256	9
S04-166	19.3891	-155.258	13
S04-167	19.3923	-155.26	15
S04-168	19.3144	-155.151	<1
S04-169	19.3169	-155.16	1
S04-170	19.3129	-155.142	1-2
S04-171	19.3137	-155.138	<1
S04-174	19.33	-155.193	3
S04-175	19.329	-155.199	6
S04-177	19.3304	-155.163	1
S04-178	19.3344	-155.163	<1
S04-179	19.337	-155.168	1
S04-180	19.3339	-155.17	1
S04-181	19.3334	-155.166	1
S04-182	19.3343	-155.157	<0.5
S04-183	19.3301	-155.157	1-2
S04-176	19.3257	-155.165	1.5
S04-184	19.3953	-155.261	23
S04-185	19.3961	-155.257	16
S04-188	19.343	-155.279	4
S04-190	19.3439	-155.282	<<1
S04-192	19.3444	-155.286	<1
S04-193	19.3451	-155.289	0.2-0.3
S04-194	19.3447	-155.292	0.1
S04-195	19.3664	-155.279	2
S04-195A	19.3664	-155.279	2
S04-196	19.3677	-155.282	0.5
S04-197	19.369	-155.284	0.2-0.3
S04-199	19.3639	-155.282	0.5
S04-200	19.3608	-155.28	0.7
S04-201	19.359	-155.28	3
S04-202	19.3588	-155.283	<0.5
S04-198	19.37	-155.287	0.2
S04-186	19.3984	-155.253	11
S04-204	19.3844	-155.244	10
S04-206	19.3787	-155.219	2-3
S04-207	19.3808	-155.22	0-1
S04-208	19.3835	-155.222	1
S04-209	19.3847	-155.223	0-0.5
S04-210	19.3862	-155.224	0-3
S04-211	19.3873	-155.225	0-3
S04-212	19.3939	-155.229	0-0.5
S04-213	19.395	-155.23	1-2
S04-214	19.3957	-155.23	0-0.5
S04-222	19.3543	-155.28	0.3-0.5
S04-223	19.3517	-155.281	1-2
S04-224	19.3522	-155.278	1-2
S04-225	19.3553	-155.279	1-2
S04-226	19.3467	-155.276	2
S04-227	19.3495	-155.277	0-3
S04-228	19.3495	-155.281	<1
S04-229	19.3497	-155.284	<0.5
S04-232	19.347	-155.284	<0.5
S04-233	19.3469	-155.281	2
S04-234	19.3383	-155.276	3
S04-235	19.3787	-155.237	4
S04-236	19.3706	-155.221	2-5
S04-237	19.3817	-155.241	10-13
S05-1	19.3375	-155.279	2.5
S05-2	19.3382	-155.282	0.5-1
S05-3	19.3393	-155.285	0.5
S05-5	19.3367	-155.29	<1
S05-7	19.336	-155.286	0.5
S05-8	19.3352	-155.283	<1
S05-9	19.3343	-155.28	1
S05-10	19.3699	-155.237	7-8
S05-11	19.363	-155.225	4-5
S05-12	19.3593	-155.214	2-3
S05-13	19.3603	-155.218	4-5
S05-14	19.3403	-155.274	2-3
S05-15	19.345	-155.276	3-4
S05-16	19.3366	-155.278	2
F05-2	19.3321	-155.222	3
S05-17	19.3651	-155.261	7-11
F4-69	19.364	-155.261	7
S05-21	19.3373	-155.296	0.1
S05-22	19.3401	-155.269	2
F05-19	19.3607	-155.253	9
S05-25	19.3244	-155.22	7
S05-26	19.3233	-155.224	3
S05-27	19.3221	-155.229	2
S05-28	19.3214	-155.233	3.5-4
S05-29	19.322	-155.239	5
S05-30	19.3206	-155.244	3
S05-31	19.3196	-155.269	3-4
S05-32	19.3208	-155.264	2.5
S05-33	19.3203	-155.259	3
S05-34	19.3204	-155.254	4
S05-35	19.3227	-155.252	3-4
S05-36	19.3214	-155.248	4
S05-37	19.3173	-155.252	2
S05-38	19.3145	-155.253	2
F05-20	19.3042	-155.258	1.5-2
F05-21	19.3051	-155.248	1-2
S05-39	19.4082	-155.251	4
S05-41	19.3438	-155.163	<1
S05-42	19.3455	-155.163	<1
S05-43	19.3358	-155.148	<0.5
S05-44	19.3372	-155.146	<0.5
S04-118A	19.349	-155.209	8
S05-48	19.3585	-155.214	3
S05-49	19.4088	-155.252	7
S05-50	19.4025	-155.266	39
S05-51	19.4107	-155.249	<1
S05-52	19.4098	-155.245	1-2
S05-53	19.4096	-155.243	<1
S05-60	19.3184	-155.219	4
S05-61	19.3156	-155.222	3
S05-62	19.3179	-155.215	4
S05-63	19.3233	-155.216	7
S05-68	19.3746	-155.206	1-3
S05-69	19.3713	-155.207	2
S05-70	19.3722	-155.203	2-3
S05-71	19.3751	-155.2	1-3
S05-72	19.3764	-155.196	0-2
S05-73	19.3783	-155.193	1
S05-74	19.3793	-155.188	0-2
S05-75	19.3775	-155.185	1-2
S05-76	19.3799	-155.181	0-1
S05-77	19.383	-155.178	0-1
S05-78	19.3829	-155.173	0-1
S05-79	19.3767	-155.174	1-2
S05-80	19.3741	-155.175	0-1
S05-81	19.3706	-155.176	0-1
S05-94	19.3472	-155.201	8
S05-95	19.3494	-155.2	7
S05-96	19.3416	-155.203	5-7
S05-97	19.3386	-155.202	10
S05-98	19.3142	-155.133	<1
S05-99	19.2889	-155.131	1.5
S05-100	19.2932	-155.147	<1
S05-104	19.36	-155.167	1
S05-105	19.3609	-155.171	1
S05-106	19.3624	-155.174	<1
S05-107	19.3619	-155.163	0.5
S05-101	19.3487	-155.166	<1
S05-102	19.3525	-155.165	<1
S05-103	19.3561	-155.166	1-1.5
S05-108	19.3858	-155.176	<0.5
S05-109	19.3872	-155.173	<0.5
S05-110	19.3879	-155.169	<0.5
S05-111	19.3854	-155.167	<0.5
S05-112	19.3867	-155.163	tr
S05-113	19.381	-155.166	<0.5
S05-114	19.3788	-155.17	<1
S05-115	19.3541	-155.222	11
S05-116	19.2864	-155.125	0.5
S05-117	19.284	-155.118	0.5-1
S05-118	19.2867	-155.114	0.5
S05-119	19.2899	-155.111	0.1-0.5
S05-120	19.2918	-155.107	0.5
S05-121	19.2955	-155.103	0.2-0.3
S05-122	19.3038	-155.15	1
S05-123	19.3753	-155.166	0
S05-124	19.3769	-155.162	<0.5
S05-126	19.3764	-155.155	tr
S05-87	19.3541	-155.119	tr
S05-92	19.34	-155.107	tr
S05-127	19.302	-155.145	0-0.5
S05-128	19.303	-155.14	1.5
S05-129	19.3041	-155.135	1
S05-130	19.3046	-155.131	0-0.5
S05-131	19.3057	-155.126	<0.5
S05-132	19.3023	-155.128	2-3
S05-133	19.2996	-155.132	0.5
S05-134	19.2996	-155.137	0.5-1
S05-135	19.299	-155.143	0.5
S05-136	19.2991	-155.148	0.5
S05-138	19.3306	-155.194	4
S05-139	19.3271	-155.183	0-5
S05-140	19.377	-155.238	4-7
S04-6	19.3997	-155.266	30
F03-8	19.3239	-155.222	5
S05-145	19.4052	-155.263	15
S05-146	19.4052	-155.253	5
S05-147	19.3719	-155.274	4-5
S05-150	19.3648	-155.281	2.5
S05-151	19.3627	-155.28	3
S05-153	19.3541	-155.28	<1
S05-154	19.3423	-155.275	3
S05-155	19.3464	-155.275	3
S05-156	19.3479	-155.276	1
S05-160	19.3992	-155.267	31
S05-161	19.3983	-155.269	27
S05-165	19.3781	-155.283	1-1.5
KMU 157	19.3647	-155.215	6
KMU 158	-0.00164	-0.00256	6
KMU 159	19.3467	-155.216	4
KMU 161	19.3883	-155.255	10
KMU 162	19.3866	-155.254	5
KMU 163	19.3851	-155.253	12
S05-184	19.3666	-155.16	<1
S05-181	19.3722	-155.151	tr
S05-183	19.3688	-155.157	tr
S05-187	19.3217	-155.245	5-8
S05-200	19.3928	-155.243	6
S05-201	19.3951	-155.239	2-3
S05-197	19.4049	-155.242	1
S05-272	19.327	-155.28	0-2
S05-273	19.3277	-155.284	0.5
S05-274	19.3284	-155.289	0.5-1
S05-275	19.3288	-155.293	0.1-0.2
S05-281	19.4083	-155.251	2-3
S06-1	19.356	-155.249	6.5
S06-2	19.354	-155.241	4
S06-3	19.3518	-155.238	7
F05-14	19.3458	-155.263	4
S06-5	19.3444	-155.256	7
S06-6	19.3672	-155.219	10
S06-8	19.3675	-155.275	2.5
S06-9	19.3848	-155.271	7
S06-10	19.3805	-155.267	5-8
S06-14	19.3086	-155.215	<1
S06-15	19.3071	-155.215	2
S06-16	19.3027	-155.221	1.5
S06-17	19.297	-155.225	1.5
S06-18	19.2882	-155.226	1.5-2
S06-19	19.2866	-155.232	<1
S06-20	19.2857	-155.235	1.5
S06-21	19.2837	-155.24	<1
S06-22	19.2846	-155.246	1
S06-28	19.3947	-155.269	19
S06-29	19.3983	-155.264	11
S06-36	19.4047	-155.261	18
S06-37	19.4056	-155.253	2-6
S06-39	19.4066	-155.26	10
S06-40	19.3121	-155.203	1.5
S06-42	19.3004	-155.208	0.5
S06-43	19.2935	-155.211	2
S06-44	19.287	-155.21	1
S06-46	19.2738	-155.205	0.5
S06-47	19.2738	-155.206	1.5
S06-48	19.2731	-155.212	1.5
S06-49	19.3893	-155.272	9
S06-50	19.3891	-155.269	18
S06-51	19.4102	-155.25	0.5-1
S06-52	19.4028	-155.259	4
S06-60	19.2692	-155.249	2
S06-61	19.2691	-155.244	1
S06-62	19.2689	-155.237	1
S06-63	19.2685	-155.229	1
S06-64	19.2681	-155.222	5
S06-65	19.2657	-155.215	2
S06-66	19.295	-155.153	1.5
S06-67	19.2925	-155.156	2
S06-68	19.3307	-155.206	6
S06-69	19.3159	-155.107	2
S06-70	19.3137	-155.113	3
S06-71	19.3317	-155.273	1.5
F06-5	19.3245	-155.272	3-4
S06-72	19.3213	-155.275	0.5
S06-73	19.3202	-155.262	1.5
S06-75	19.3512	-155.208	4
S06-76	19.3383	-155.224	1-1.5
F06-11	19.3379	-155.224	3-4
F06-15	19.3265	-155.22	2
S06-91	19.4085	-155.257	5-6
S06-93	19.4036	-155.264	53
S06-94A	19.2971	-155.176	2
S06-95	19.2943	-155.183	1
S06-96A	19.2871	-155.184	2
S06-97A	19.2799	-155.183	3
S06-98	19.273	-155.18	2
S06-99	19.2668	-155.176	1.5
S06-100	19.2671	-155.168	1
S05-290A	19.3133	-155.094	2-4
S05-291A	19.3081	-155.094	<7
S05-292A	19.3011	-155.094	5
S06-105A	19.3012	-155.086	1-4
S06-106A	19.2784	-155.127	1-4
S06-107	19.4072	-155.253	2.5-3
S06-38	19.4062	-155.26	7
S07-13	19.3414	-155.225	4.5
S07-14	19.3365	-155.274	4
S07-15	19.3498	-155.256	7
S07-17	19.3364	-155.246	5
S07-18	19.331	-155.248	3
S07-19	19.3257	-155.249	3
S07-21	19.3194	-155.277	1-1.5
S07-22	19.3142	-155.278	0
S07-24	19.3141	-155.277	0.5
S07-25	19.3193	-155.277	1.5
S07-26	19.3412	-155.271	2.5
S07-27	19.3578	-155.253	4.5
S07-28	19.3548	-155.254	6
S07-29	19.3953	-155.274	11.5
S07-35	19.3666	-155.245	11
S07-37	19.3456	-155.265	3-4
S07-39	19.3969	-155.272	17
S07-41	19.3982	-155.27	25
S07-42	19.3989	-155.268	33
S07-68	19.41	-155.258	4
S07-69	19.406	-155.26	12
S07-70	19.4045	-155.263	34-41
S05-159	19.4001	-155.27	30
S9-53	19.4007	-155.268	42
S08-1	19.4015	-155.269	48
S08-2	19.3914	-155.272	11
S08-180	19.3597	-155.267	6.5
S08-182	19.353	-155.264	6
S08-183	19.3566	-155.271	4
S08-184	19.3607	-155.273	5
S09-2	19.3718	-155.243	10
S09-34	19.3854	-155.278	2.5
S09-37	19.3902	-155.275	5
S09-47	19.3894	-155.273	7
S09-58	19.391	-155.268	11
S09-60	19.3893	-155.267	13
S09-96	19.3525	-155.206	4
S10-568	19.3872	-155.271	12
S10-578	19.4021	-155.256	9
S10-579	19.4015	-155.252	16
S10-580	19.4004	-155.252	7
S10-581	19.4	-155.251	8
S10-582	19.4015	-155.246	3
S10-583	19.2983	-155.225	3
S10-585	19.3289	-155.245	5
F10-9	19.3202	-155.266	2
S10-594A	19.3854	-155.244	7
S10-595A	19.3789	-155.24	5
S10-596	19.3858	-155.251	11
S10-597	19.3717	-155.231	16
S10-598	19.382	-155.241	9
S10-599	19.3745	-155.236	6
S10-600	19.3706	-155.221	9.5
S10-601	19.3807	-155.22	4
S10-602	19.3843	-155.223	5
S10-603	19.3908	-155.227	5
S10-604	19.3952	-155.23	0-3
S10-605	19.4039	-155.234	0.5
F6-7	19.3638	-155.265	4
S10-695	19.3649	-155.266	3
S10-696	19.3613	-155.269	11
F0-28	19.3616	-155.252	4.5
S12-114	19.3691	-155.267	8
S13-363	19.3633	-155.259	10
S13-403	19.3696	-155.266	7
S16-183	19.3992	-155.259	16
WGS84
tr, trace

## Sheet: Fig. 15B
Site	Lat	Long	Median grain size, mm
S05-28 combined	19.3214	-155.233	2.56
S05-68A	19.3746	-155.206	4.77
S05-94A	19.3472	-155.201	2.99
S05-98A	19.3142	-155.133	1.28
S05-99A	19.2889	-155.131	1.09
F05-19-2 to 6 combined	19.3607	-155.253	3.44
S05-115A1-2combined	19.3541	-155.222	3.28
S05-116A	19.2864	-155.125	0.95
S05-120A	19.2918	-155.107	1.09
S05-122A	19.3038	-155.15	1.2
S05-134A	19.2996	-155.137	1.18
S04-103	19.365	-155.216	3.62
S04-119	19.3406	-155.209	3.65
S05-138A	19.3306	-155.194	1.6
S04-134average	19.3258	-155.183	1.7
S05-139A	19.3271	-155.183	2.2
S05-140A	19.377	-155.238	4.6
S04-85A	19.3742	-155.217	3.72
S04-206A	19.3787	-155.219	5.3
S04-210A	19.3862	-155.224	6.11
S04-160A	19.3989	-155.233	2.19
S01-16 combined	19.4014	-155.267	5.1
S04-36 combined	19.3928	-155.272	5.06
S04-6 combined	19.3997	-155.266	5.28
S05-154	19.3423	-155.275	2.44
KMU 163	19.3851	-155.253	3.89
S04-67	19.3844	-155.283	1.25
S04-45	19.3931	-155.278	3.69
S04-62	19.3935	-155.283	2.53
S04-63	19.3941	-155.284	2.55
S0-25	19.3913	-155.245	5.3
S04-26	19.3996	-155.272	5.48
S05-145 combo	19.4052	-155.263	3.55
S05-146	19.4052	-155.253	6.05
S05-185A	19.3506	-155.254	4.59
S04-150A	19.3364	-155.274	0.89
S05-32B	19.3208	-155.264	1.48
S05-186B	19.3244	-155.22	1.59
S05-187A	19.3217	-155.245	2.22
S05-34B	19.3204	-155.254	0.95
S05-170A	19.3404	-155.204	2.53
S05-195A	19.3492	-155.226	2.17
S04-94A	19.4048	-155.247	2.3
S05-197A	19.4049	-155.242	1.58
S05-200A	19.3928	-155.243	6.5
S05-201A	19.3951	-155.239	5.88
S05-202A	19.3638	-155.222	3.95
S04-88A	19.3571	-155.224	3.56
S05-208A	19.3159	-155.127	0.86
S05-209A	19.3207	-155.124	1.05
S05-210A	19.3257	-155.119	0.56
S05-216A	19.3138	-155.118	0.58
S05-217A	19.3135	-155.125	0.82
S05-165A	19.3781	-155.283	3.6
S04-29	19.3788	-155.277	5.26
S05-230A	19.3827	-155.264	3.48
S05-236A	19.3559	-155.26	2.96
S05-235B	19.3625	-155.256	3.99
S05-234A	19.364	-155.265	3.96
S05-231A	19.381	-155.269	3.02
S05-233A	19.3653	-155.26	3.32
S04-41	19.392	-155.268	4.28
S05-71A	19.3751	-155.2	3.71
S05-75A	19.3775	-155.185	2.99
S05-246A	19.3712	-155.205	2.74
S05-42A	19.3455	-155.163	1.07
S04-180A	19.3339	-155.17	0.93
S05-262A	19.3488	-155.229	3.01
S05-253A	19.3748	-155.265	2.81
S05-268B	19.3439	-155.23	2.73
F05-2B	19.3321	-155.222	2.03
S05-270A	19.3704	-155.25	2.57
S05-271A	19.3698	-155.238	4.36
S05-272	19.327	-155.28	1.23
S05-274	19.3284	-155.289	0.84
S05-50combined	19.4025	-155.266	4.52
S05-52A	19.4098	-155.245	0.66
S05-281A	19.4083	-155.251	4.72
S04-47	19.3871	-155.279	2.15
S05-147A	19.3719	-155.274	4.57
S04-184 combined	19.3953	-155.261	3.67
S04-167 combo	19.3923	-155.26	3.28
S04-166 combo	19.3891	-155.258	3.47
S04-165 combo	19.387	-155.256	3.56
S04-9 combo	19.3981	-155.263	5.58
F7-26A	19.3939	-155.251	5.53
S04-162 combo	19.3874	-155.248	5.17
S04-66	19.3845	-155.282	1.62
S06-1A	19.356	-155.249	3.91
S06-2A	19.354	-155.241	3.03
S06-3	19.3518	-155.238	3
F05-14B	19.3458	-155.263	1.35
S06-5B	19.3444	-155.256	3.9
S06-6A	19.3672	-155.219	4.66
S04-118B	19.349	-155.209	2.82
S06-8	19.3675	-155.275	3.02
S06-9	19.3848	-155.271	5.87
S06-10	19.3805	-155.267	4.52
S06-15B	19.3071	-155.215	1.32
S06-16B	19.3027	-155.221	1.06
S06-18B	19.2882	-155.226	1.36
S06-17B	19.297	-155.225	1.23
S06-20B	19.2857	-155.235	0.75
S06-22C-recal	19.2846	-155.246	1.02
S06-19B	19.2866	-155.232	2.91
S06-37B	19.4056	-155.253	5.62
S06-39A	19.4066	-155.26	3.36
S06-36 combo	19.4047	-155.261	5.03
S06-40A	19.3121	-155.203	1.22
S06-47A	19.2738	-155.206	0.87
S06-42B	19.3004	-155.208	0.91
S06-43B	19.2935	-155.211	1.16
S06-44B	19.287	-155.21	0.88
S06-46B	19.2738	-155.205	0.78
S06-48B	19.2731	-155.212	0.75
S04-56	19.4055	-155.262	5.04
S06-49 combo	19.3893	-155.272	5.58
S06-50 combo	19.3891	-155.269	3.78
S06-28 combo	19.3947	-155.269	4.19
S06-51B	19.4102	-155.25	0.39
S06-52	19.4028	-155.259	3.48
S06-64A	19.2681	-155.222	1.49
S06-67B	19.2925	-155.156	0.71
S06-68C	19.3307	-155.206	1.42
F06-15-2	19.3265	-155.22	1.32
F06-11-3	19.3379	-155.224	1.34
F06-5C	19.3245	-155.272	1.4
S06-72	19.3213	-155.275	0.98
F06-9	19.3198	-155.268	1.3
S06-75A	19.3512	-155.208	2.7
S06-71	19.3317	-155.273	0.64
S06-60B	19.2692	-155.249	0.79
S06-61B	19.2691	-155.244	0.5
S06-62B	19.2689	-155.237	0.54
S06-63B	19.2685	-155.229	0.46
S06-65B	19.2657	-155.215	0.65
S06-66B	19.295	-155.153	0.68
S06-69	19.3159	-155.107	0.7
S06-70A	19.3137	-155.113	0.77
S06-76	19.3383	-155.224	1.22
S06-87B adj	19.2991	-155.246	1.86
S06-89B adj	19.3001	-155.231	0.97
S06-86B	19.3003	-155.252	0.82
S06-91combo	19.4085	-155.257	6.32
S06-93combo	19.4036	-155.264	4.04
S06-94A	19.2971	-155.176	0.84
S06-95	19.2943	-155.183	0.82
S06-96A	19.2871	-155.184	1.22
S06-97A	19.2799	-155.183	0.9
S06-98	19.273	-155.18	0.71
S06-99	19.2668	-155.176	0.58
S06-100	19.2671	-155.168	0.55
S06-90B	19.2999	-155.225	0.81
S06-85	19.3001	-155.26	0.98
S06-88	19.2993	-155.238	0.82
S06-101	19.4038	-155.265	3.9
S04-53	19.404	-155.265	4.04
S05-290A	19.3133	-155.094	0.41
S05-291A	19.3081	-155.094	0.5
S05-292A	19.3011	-155.094	0.38
S04-124combo	19.3367	-155.186	1.92
S04-126A	19.344	-155.186	1.5
S06-105A	19.3012	-155.086	0.32
S06-106A	19.2784	-155.127	0.96
S06-31modified	19.275	-155.268	0.62
S06-38combo	19.4062	-155.26	6.05
S06-107A	19.4072	-155.253	5.76
S04-46combo	19.3942	-155.276	4.52
S07-17	19.3364	-155.246	1.5
S07-18	19.331	-155.248	1.68
S07-19	19.3257	-155.249	1.27
S06-26modified	19.3412	-155.271	2.39
S07-13A	19.3414	-155.225	2.41
S07-15BCmodified	19.3498	-155.256	3.06
S07-14combo	19.3365	-155.274	2.55
S07-21 modified	19.3194	-155.277	1.3
S07-24	19.3141	-155.277	1.18
S07-25	19.3193	-155.277	1.15
S07-27combo	19.3578	-155.253	2.56
S07-28combo	19.3548	-155.254	2.87
S07-29combo	19.3953	-155.274	4.98
S07-35combo	19.3666	-155.245	2.51
S07-37modified	19.3456	-155.265	2.53
S07-39combo	19.3969	-155.272	5.67
S07-41combo	19.3982	-155.27	4.36
S07-42combo	19.3989	-155.268	4.36
S07-68combo	19.41	-155.258	3.17
S07-69combo	19.406	-155.26	3.14
S07-70combo	19.4045	-155.263	4.65
S05-159combo	19.4001	-155.27	4.56
S08-1combo	19.4015	-155.269	4.04
S08-2combo	19.3914	-155.272	4.66
S08-180	19.3597	-155.267	3.34
S08-182	19.353	-155.264	2.6
S08-183	19.3566	-155.271	3.85
S08-184	19.3607	-155.273	4.31
S09-1A	19.3602	-155.254	3.17
S09-2combo	19.3718	-155.243	3.27
S09-51combo	19.3832	-155.262	2.71
S09-96	19.3525	-155.206	2.53
S10-578combo	19.4021	-155.256	4.66
S10-579	19.4015	-155.252	7.74
S10-580	19.4004	-155.252	7
S10-581	19.4	-155.251	8.26
S10-582A	19.4015	-155.246	5.33
S10-583	19.2983	-155.225	0.76
S10-585	19.3289	-155.245	2.74
F10-26-1A	19.3061	-155.254	1.77
F10-28-1	19.2916	-155.257	0.73
F10-29-1	19.315	-155.277	1.6
S10-594A	19.3854	-155.244	4.22
S10-595A	19.3789	-155.24	3.85
S10-596combo	19.3858	-155.251	3.45
S10-597A	19.3717	-155.231	4.58
S10-598A	19.382	-155.241	3.78
S10-599A	19.3745	-155.236	4.14
S10-600A	19.3706	-155.221	4.46
S10-601A	19.3807	-155.22	3.32
S10-602A	19.3843	-155.223	4.94
S10-603A	19.3908	-155.227	2.45
S10-604A	19.3952	-155.23	1.72
S10-605A	19.4039	-155.234	0.77
S10-612tweaked	19.384	-155.281	1.29
S16-183C	19.3992	-155.259	4.85

## Sheet: Fig. 17
Site	Lat	Long	Thickness, cm
S04-63	19.3941	-155.284	34
S07-12	19.3931	-155.278	22
S04-46	19.3942	-155.276	16
S07-29	19.3953	-155.274	20
S07-39	19.3969	-155.272	6
S07-41	19.3982	-155.27	10
S07-42	19.3989	-155.268	19
S06-91	19.4085	-155.257	6
S9-59	19.4211	-155.243	5
S9-64	19.4097	-155.258	6
S9-69	19.4211	-155.291	5
S07-43	19.4021	-155.293	13
S06-12	19.4327	-155.273	10
S06-13	19.4336	-155.274	9
S07-45	19.4158	-155.287	8
S07-46	19.4205	-155.288	6
S07-47	19.4351	-155.274	4.5
S07-48	19.4106	-155.291	16
S07-49	19.4057	-155.292	8
S05-59	19.4321	-155.273	8
S05-55	19.4179	-155.252	11
S05-54	19.4094	-155.241	3?
S05-52	19.4098	-155.245	8
S05-51	19.4107	-155.249	7
S07-55	19.4239	-155.283	3
S07-56	19.4223	-155.286	3.5
S07-57	19.4295	-155.278	5
S07-59	19.4301	-155.27	6
S07-60	19.4354	-155.273	8
S07-61	19.43	-155.266	3
S07-62	19.4298	-155.261	4
S07-65	19.4228	-155.257	2
S05-58	19.4191	-155.253	2
S07-66	19.434	-155.274	7
S9-61	19.4134	-155.258	4?
S07-68	19.41	-155.258	7
S07-69	19.406	-155.26	10
S07-70	19.4045	-155.263	20
S05-159	19.4001	-155.27	8
S08-1	19.4015	-155.269	6
S08-2	19.3914	-155.272	3
S06-49	19.3893	-155.272	3
S04-167	19.3923	-155.26	4
S04-166	19.3891	-155.258	1
S04-162	19.3874	-155.248	7
S04-184	19.3953	-155.261	5
S04-185	19.3961	-155.257	3
S04-186	19.3984	-155.253	3
S04-93	19.404	-155.251	8
S04-94	19.4048	-155.247	6
S04-95	19.4021	-155.246	3
S05-39	19.4082	-155.251	7
S0-25	19.3913	-155.245	5?
S04-83	19.3792	-155.266	2
S04-156	19.3929	-155.243	5
S04-157	19.3942	-155.24	4
S04-158	19.3958	-155.238	3
S04-160	19.3989	-155.233	3
S04-214	19.3957	-155.23	4
S05-200	19.3928	-155.243	4
S08-6	19.4014	-155.266	16
S08-14	19.4128	-155.3	3
S08-10	19.4115	-155.297	5
J1	19.4131	-155.3	15
S08-12	19.4287	-155.258	>3
S08-13	19.4133	-155.3	5
S08-19	19.4041	-155.31	1
S08-60	19.4168	-155.298	3.5
S08-128	19.3852	-155.301	10.5
S08-130	19.3913	-155.305	1.5
S08-131	19.4019	-155.303	4.5
S08-132	19.3958	-155.3	4
S08-135	19.4072	-155.311	3
S08-143	19.4155	-155.303	4
S08-146	19.4107	-155.302	2
S08-149	19.423	-155.291	5
S08-151	19.4248	-155.293	4
S08-155	19.422	-155.298	3
S08-157	19.4048	-155.313	4
S08-158	19.3784	-155.321	2
S08-159	19.373	-155.318	1
S08-160	19.3673	-155.315	2
S08-161	19.3741	-155.309	4.5
S08-163	19.3711	-155.31	3
S08-164	19.3605	-155.312	1
S08-210	19.4129	-155.29	9
S08-212	19.4142	-155.289	21
S08-213	19.4115	-155.29	25
S08-209	19.4137	-155.292	10
S08-235	19.4172	-155.293	2
F7-26	19.3939	-155.251	10
S09-4	19.408	-155.296	4.5
S09-37	19.3902	-155.275	7
S09-42	19.3878	-155.293	7.5
S09-71	19.4233	-155.253	2
S09-85	19.408	-155.298	3.5
S09-90	19.401	-155.299	6.5
S09-110	19.4093	-155.301	3
S09-113	19.4087	-155.307	3
S09-114	19.4064	-155.307	9
S09-116	19.4031	-155.306	25
S09-117	19.4046	-155.302	3
S09-118	19.4063	-155.304	3.5
S09-122	19.4262	-155.288	4
S09-126	19.4256	-155.292	2
S09-128	19.4219	-155.294	3
S09-129	19.4228	-155.296	3
S09-130	19.4239	-155.298	1
S09-133	19.4199	-155.297	3
S09-134	19.4179	-155.296	6
S09-141	19.4266	-155.286	2.5
S09-140	19.4277	-155.286	4
S09-151	19.4287	-155.286	2
S09-306	19.4293	-155.284	1.5
S09-323	19.4335	-155.285	9
S09-328	19.4375	-155.29	2.5
S09-1194	19.414	-155.289	18
S09-1196	19.4081	-155.293	6
K1790-9-44	19.4135	-155.3	7.5
S10-609	19.4206	-155.288	3.5
S10-669	19.4125	-155.295	3.5
S10-671	19.4256	-155.286	3
S10-677	19.401	-155.298	1.5
S12-106	19.4079	-155.294	6
S13-365	19.3847	-155.303	7
S16-183	19.3992	-155.259	2.5
WGS84

## Sheet: Fig. 18
Site	Lat	Long	Thickness, cm
S09-76	19.4091	-155.296	1.5
S09-119	19.425	-155.29	2
S09-122	19.4262	-155.288	1
S09-126	19.4256	-155.292	1
S09-128	19.4219	-155.294	1
S09-129	19.4228	-155.296	1
S09-130	19.4239	-155.298	1
S09-131	19.4212	-155.299	1
S09-133	19.4199	-155.297	1
S09-134	19.4179	-155.296	2
S09-141	19.4266	-155.286	1
S09-140	19.4277	-155.286	1
S09-151	19.4287	-155.286	1
S09-306	19.4293	-155.284	0.5
S09-323	19.4335	-155.285	1
S09-328	19.4375	-155.29	1
S09-330	19.4372	-155.292	0.5
S09-376	19.4284	-155.289	0.5
S09-401	19.4258	-155.293	1
S09-420	19.4336	-155.28	2
S09-1162	19.4099	-155.3	1
S09-1192	19.4176	-155.286	4
S09-1194	19.414	-155.289	4
S09-1196	19.4081	-155.293	2
S07-45	19.4158	-155.287	3
S07-46	19.4205	-155.288	2.5
S07-48	19.4106	-155.291	3
S07-49	19.4057	-155.292	1.5
S07-54	19.4261	-155.283	0.5
S07-55	19.4239	-155.283	1
S07-56	19.4223	-155.286	2
S08-11	19.4156	-155.294	2
S08-10	19.4115	-155.297	3
S08-13	19.4133	-155.3	0.2
S08-14	19.4128	-155.3	0.5
S08-60	19.4168	-155.298	1.3
S08-143	19.4155	-155.303	0.1
S08-149	19.423	-155.291	3
S08-209	19.4137	-155.292	4
S08-212	19.4142	-155.289	4
S08-213	19.4115	-155.29	4
S08-235	19.4172	-155.293	2
J1	19.4131	-155.3	0.1
S09-4	19.408	-155.296	1.3
S09-85	19.408	-155.298	0.5
S09-82	19.4156	-155.295	1.5
S09-87	19.4065	-155.299	0.5
S09-89	19.4035	-155.299	1
S09-90	19.401	-155.299	0.7
S09-92	19.421	-155.29	1
S9-69	19.4212	-155.291	1.5
S09-1198	19.417	-155.3	0.8
K1790-09-3	19.419	-155.298	3
S09-307	19.4309	-155.284	2
S09-1210	19.4172	-155.302	1
S09-1211	19.4188	-155.304	0.5
S09-1212	19.4187	-155.307	0.3
S09-1213	19.4177	-155.309	1.5
S09-1216	19.4154	-155.306	1.8
K1790-9-51	19.4153	-155.302	1.5
K1790-9-44	19.4135	-155.3	2
K1790-9-48	19.4152	-155.3	0.5
K1790-9-14	19.4149	-155.297	1.7
K1790-9-46	19.4106	-155.302	1.5
S09-1217	19.4123	-155.304	2
S09-1218	19.4132	-155.307	1.5
S09-1220	19.41	-155.31	0.3
S09-1222	19.4091	-155.304	1
S09-1223	19.4117	-155.299	1
K1790-9-40	19.413	-155.296	2
S09-1224	19.4227	-155.3	1
S09-1225	19.4249	-155.302	1
S09-1227	19.4297	-155.306	0.3
S09-1230	19.4237	-155.308	1
S09-1231	19.4222	-155.305	0.5
S09-1232	19.4211	-155.304	1
S09-1234	19.4232	-155.314	0.8
S09-1236	19.4162	-155.316	0.5
S09-1250	19.4081	-155.322	1
S09-1262	19.4051	-155.315	1
S09-1263	19.4078	-155.316	1
S09-1264	19.4101	-155.317	1
S09-1296	19.4026	-155.32	0.5
S09-1299	19.4025	-155.316	0.5
S09-1300	19.405	-155.318	0.5
S09-1301	19.4081	-155.319	2
S09-1270	19.4285	-155.283	0.5
S09-1273	19.4266	-155.285	0.8
S07-59	19.4301	-155.27	0.8
S10-609	19.4206	-155.288	2
S10-644	19.4075	-155.307	2
S09-110	19.4093	-155.301	1.5
S09-113	19.4087	-155.307	1
S09-114	19.4064	-155.307	0.3
S09-117	19.4046	-155.302	1.5
S09-118	19.4063	-155.304	1.5
S10-668	19.4204	-155.289	2
S10-671	19.4256	-155.286	2
S08-210	19.4129	-155.29	4
S10-682	19.4151	-155.291	2.5
S10-683	19.4119	-155.292	2.5
S10-684	19.4115	-155.294	2
S12-106	19.4079	-155.294	2
WGS84

## Sheet: Fig. 19
Site	Lat	Long	Thickness, cm
S04-63	19.3941	-155.284	223
S05-288	19.3955	-155.286	269
S07-12	19.3931	-155.278	250
S04-46	19.3942	-155.276	225
S07-29	19.3953	-155.274	217
S07-39	19.3969	-155.272	112
S07-41	19.3982	-155.27	211
S07-42	19.3989	-155.268	182
S01-46	19.4284	-155.255	0?
S06-91	19.4085	-155.257	31
S9-59	19.4211	-155.243	0?
S9-64	19.4097	-155.258	3
S07-43	19.4021	-155.293	80
S05-49	19.4088	-155.252	5?
S9-36	19.4143	-155.234	2?
S07-65	19.4228	-155.257	17
S05-58	19.4191	-155.253	7
S07-69	19.406	-155.26	24
S07-70	19.4045	-155.263	75
S05-159	19.4001	-155.27	114
S06-49	19.3893	-155.272	3
S04-167	19.3923	-155.26	7
S04-166	19.3891	-155.258	15?
S04-185	19.3961	-155.257	14
S04-186	19.3984	-155.253	22
S04-93	19.404	-155.251	3?
S04-95	19.4021	-155.246	7?
S0-25	19.3913	-155.245	4?
F7-26	19.3939	-155.251	5
S09-53	19.3836	-155.259	2
S09-91	19.3994	-155.298	20?
S09-105	19.3974	-155.298	2.5
S10-578	19.4021	-155.256	3.5
S10-596	19.3858	-155.251	8
S10-601	19.3807	-155.22	4
S10-602	19.3843	-155.223	9
S10-603	19.3908	-155.227	4
S10-604	19.3952	-155.23	8
S10-605	19.4039	-155.234	10
S10-600	19.3706	-155.221	2
F6-7	19.3638	-155.265	1
S10-695	19.3649	-155.266	1.5
S10-696	19.3613	-155.269	19
S12-104	19.3786	-155.275	5
S12-114	19.3691	-155.267	1.5
S13-365	19.3847	-155.303	7
S16-183	19.3992	-155.259	25
WGS84

[truncated: 8 more sheets: Fig. 22, Fig. 23, Fig. 26, Fig. 27 L1 and L2, Fig. 27 L1 only, Fig. 28, Fig. 29, Fig. 30]
